# Supplementary material for: A new global anthropogenic SO 2 emission inventory for the last decade: a mosaic of satellite-derived and bottom-up emissions
Source: Copernicus journal article supplement (doi:10.5194/acp-18-16571-2018), 2018-11-22
Supplement: Supplementary file [file acp-18-16571-2018-supplement.pdf]

Supplement of Atmos. Chem. Phys., 18, 16571–16586, 2018  
<https://doi.org/10.5194/acp-18-16571-2018-supplement>  
© Author(s) 2018. This work is distributed under  
the Creative Commons Attribution 4.0 License.

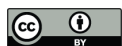

*Supplement of*

## **A new global anthropogenic SO<sub>2</sub> emission inventory for the last decade: a mosaic of satellite-derived and bottom-up emissions**

**Fei Liu et al.**

*Correspondence to:* Fei Liu ([fei.liu@nasa.gov](mailto:fei.liu@nasa.gov))

The copyright of individual parts of the supplement might differ from the CC BY 4.0 License.

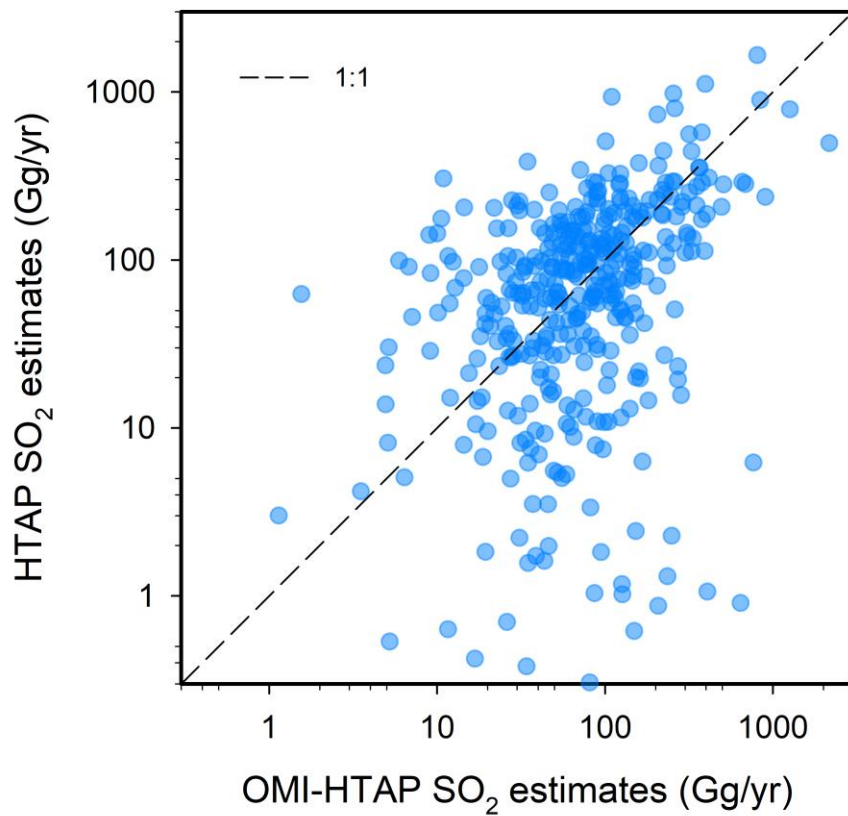

**Figure S1: Comparison of 2010 OMI-HTAP and HTAP SO<sub>2</sub> emissions for OMI-detected sources. Emissions for individual sources are calculated by summing up SO<sub>2</sub> emissions of each grid cells in the fitting domain (see Sect.2.1) from two inventories.**
